# Supplementary material for: Exceptional Diversity, Maintenance of Polymorphism, and Recent Directional Selection on the APL1 Malaria Resistance Genes of Anopheles gambiae
Source: PubMed Central journal article supplement (PMC3050937; doi:10.1371/journal.pbio.1000600), 2011-03-08
Supplement: pbio.1000600.s004.pdf [file pbio.1000600.s004.pdf]

**Supporting Table S1:** Population genetic parameter estimates for M and S form mosquitoes at the three *APLI* paralogs.

| Collection          | n <sup>1</sup> | bp <sup>2</sup> | $\pi_{\text{tot}}$ <sup>3</sup> | $\theta_{\text{tot}}$ <sup>4</sup> | TajD <sup>5</sup> | $\pi_{\text{syn}}$ <sup>6</sup> | $\pi_{\text{non}}$ <sup>7</sup> |
|---------------------|----------------|-----------------|---------------------------------|------------------------------------|-------------------|---------------------------------|---------------------------------|
| <b><i>APLIA</i></b> |                |                 |                                 |                                    |                   |                                 |                                 |
| M form              | 20             | 1669            | 0.018                           | 0.032                              | -1.784            | 0.034                           | 0.016                           |
| S form              | 28             | 1537            | 0.081                           | 0.069                              | 0.703             | 0.116                           | 0.064                           |
| <b><i>APLIB</i></b> |                |                 |                                 |                                    |                   |                                 |                                 |
| M form              | 26             | 2005            | 0.016                           | 0.021                              | -0.816            | 0.021                           | 0.017                           |
| S form              | 33             | 1966            | 0.039                           | 0.048                              | -0.691            | 0.070                           | 0.034                           |
| <b><i>APLIC</i></b> |                |                 |                                 |                                    |                   |                                 |                                 |
| M form              | 20             | 2587            | 0.009                           | 0.012                              | -1.037            | 0.015                           | 0.007                           |
| S form              | 33             | 2393            | 0.031                           | 0.028                              | 0.272             | 0.060                           | 0.022                           |

<sup>1</sup>number of alleles sequenced

<sup>2</sup>locus size, in base pairs, excluding insertions and deletions

<sup>3</sup>average number of differences per pair of alleles, per nucleotide

<sup>4</sup>Watterson's estimator of the population genetic parameter  $4N_e\mu$

<sup>5</sup>Tajima's *D* test statistic

<sup>6</sup>average number of difference per pair of alleles, per nucleotide, synonymous sites only

<sup>7</sup>average number of difference per pair of alleles, per nucleotide, nonsynonymous sites only
