# Supplementary material for: Exceptional Diversity, Maintenance of Polymorphism, and Recent Directional Selection on the APL1 Malaria Resistance Genes of Anopheles gambiae
Source: PubMed Central journal article supplement (PMC3050937; doi:10.1371/journal.pbio.1000600), 2011-03-08
Supplement: pbio.1000600.s006.pdf [file pbio.1000600.s006.pdf]

**Supporting Table S3:** Subpopulation differentiation at the *APLI* locus across geographic and temporal samples, structured by M and S molecular form. An insufficient number of M form *APLIA* alleles were sequenced from Bancoumana in the 2005 rainy season to conduct the analysis with confidence. Differentiation is estimated by  $K_{ST}^*$ , with statistical significance (in parentheses) determined through 1000 permutations of alleles among collections. In all cases, M form mosquitoes are highly significantly differentiated from S form mosquitoes regardless of geographic or temporal origin.

|                                         | 1995<br>Bancoumana dry<br>(n = 19, M form) | 1995<br>Toumani-Oulena<br>(n = 12, S form) | 1995<br>Makouchetoum<br>(n = 8, S form)  |
|-----------------------------------------|--------------------------------------------|--------------------------------------------|------------------------------------------|
| <i>APLIA</i>                            |                                            |                                            |                                          |
| 2005 Bancoumana rainy S (n = 8)         | 0.227 ( $p < 10^{-3}$ )                    | 0.045 ( $p = 0.026$ )                      | 0.042 ( $p = 0.025$ )                    |
| 1995,1997 Bancoumana rainy M<br>(n = 6) | 0.014 ( $p = 0.159$ )                      | 0.095 ( $p < 10^{-3}$ )                    | 0.119 ( $p < 10^{-3}$ )                  |
| 2007 Bancoumana dry M (n = 6)           | 0.024 ( $p = 0.133$ )                      | 0.075 ( $p = 0.005$ )                      | 0.091 ( $p = 0.003$ )                    |
|                                         | 1995<br>Bancoumana dry<br>(n = 19, M form) | 1995<br>Toumani-Oulena<br>(n = 15, S form) | 1995<br>Makouchetoum<br>(n = 12, S form) |
| <i>APLIB</i>                            |                                            |                                            |                                          |
| 2005 Bancoumana rainy M (n = 6)         | -0.010 ( $p = 0.599$ )                     | 0.050 ( $p = 0.006$ )                      | 0.065 ( $p = 0.002$ )                    |
| 2005 Bancoumana rainy S (n = 6)         | 0.241 ( $p < 10^{-3}$ )                    | 0.012 ( $p = 0.110$ )                      | 0.026 ( $p = 0.005$ )                    |
| 1995,1997 Bancoumana rainy M<br>(n = 7) | -0.019 ( $p = 0.856$ )                     | 0.103 ( $p < 10^{-3}$ )                    | 0.134 ( $p < 10^{-3}$ )                  |
| 2007 Bancoumana dry M (n = 7)           | -0.009 ( $p = 0.594$ )                     | 0.061 ( $p = 0.005$ )                      | 0.087 ( $p = 0.003$ )                    |
|                                         | 1995<br>Bancoumana dry<br>(n = 14, M form) | 1995<br>Toumani-Oulena<br>(n = 15, S form) | 1995<br>Makouchetoum<br>(n = 12, S form) |
| <i>APLIC</i>                            |                                            |                                            |                                          |
| 2005 Bancoumana rainy M (n = 5)         | 0.065 ( $p = 0.046$ )                      | 0.082 ( $p < 10^{-3}$ )                    | 0.085 ( $p < 10^{-3}$ )                  |
| 2005 Bancoumana rainy S (n = 5)         | 0.180 ( $p < 10^{-3}$ )                    | 0.014 ( $p = 0.125$ )                      | 0.023 ( $p = 0.067$ )                    |
| 1995,1997 Bancoumana rainy M<br>(n = 5) | 0.005 ( $p = 0.280$ )                      | 0.215 ( $p < 10^{-3}$ )                    | 0.129 ( $p < 10^{-3}$ )                  |
| 2007 Bancoumana dry M (n = 7)           | 0.042 ( $p = 0.071$ )                      | 0.112 ( $p < 10^{-3}$ )                    | 0.117 ( $p < 10^{-3}$ )                  |
