# Supplementary material for: Exceptional Diversity, Maintenance of Polymorphism, and Recent Directional Selection on the APL1 Malaria Resistance Genes of Anopheles gambiae
Source: PLoS Biol. 2011 Mar 8;9(3):e1000600. doi: 10.1371/journal.pbio.1000600 (PMC3050937; doi:10.1371/journal.pbio.1000600)
Supplement: Table S2 — Population genetic parameter estimates at the APL1A locus, considered separately for alleles falling in the APL1A1 and APL1A2 structural classes. (0.01 MB PDF) [file pbio.1000600.s005.pdf]

**Supporting Table S2:** Population genetic parameter estimates at the *APLIA* locus, considered separately for alleles falling in the *APLIA*<sup>1</sup> and *APLIA*<sup>2</sup> structural classes.

| Collection                      | n <sup>1</sup> | bp <sup>2</sup> | $\pi_{\text{tot}}$ <sup>3</sup> | $\theta_{\text{tot}}$ <sup>4</sup> | TajD <sup>5</sup> | $\pi_{\text{syn}}$ <sup>6</sup> | $\pi_{\text{non}}$ <sup>7</sup> |
|---------------------------------|----------------|-----------------|---------------------------------|------------------------------------|-------------------|---------------------------------|---------------------------------|
| <b><i>APLIA</i><sup>1</sup></b> |                |                 |                                 |                                    |                   |                                 |                                 |
| Bancoumana dry                  | 19             | 1669            | 0.019                           | 0.032                              | – 1.734           | 0.034                           | 0.016                           |
| Bancoumana rainy                | 9              | 1665            | 0.048                           | 0.054                              | – 0.587           | 0.086                           | 0.039                           |
| Toumani-Oulena                  | 6              | 1669            | 0.058                           | 0.062                              | – 0.434           | 0.103                           | 0.050                           |
| Makouchetoum                    | 4              | 1669            | 0.054                           | 0.057                              | – 0.598           | 0.076                           | 0.051                           |
| all pooled                      | 38             | 1665            | 0.048                           | 0.048                              | 0.623             | 0.104                           | 0.106                           |
| <b><i>APLIA</i><sup>2</sup></b> |                |                 |                                 |                                    |                   |                                 |                                 |
| Bancoumana dry                  | 0              |                 |                                 |                                    |                   |                                 |                                 |
| Bancoumana rainy                | 0              |                 |                                 |                                    |                   |                                 |                                 |
| Toumani-Oulena                  | 4              | 1917            | 0.017                           | 0.015                              | 0.919             | 0.150                           | 0.082                           |
| Makouchetoum                    | 6              | 1872            | 0.023                           | 0.024                              | – 0.457           | 0.034                           | 0.018                           |
| all pooled                      | 10             | 1872            | 0.021                           | 0.023                              | – 0.542           | 0.034                           | 0.016                           |

<sup>1</sup>number of alleles sequenced, no *APLIA*<sup>2</sup> alleles were found in the Bancoumana dry population

<sup>2</sup>locus size, in base pairs, excluding insertions and deletions

<sup>3</sup>average number of differences per pair of alleles, per nucleotide

<sup>4</sup>Watterson's estimator of the population genetic parameter 4N<sub>e</sub>m

<sup>5</sup>Tajima's *D* test statistic

<sup>6</sup>average number of difference per pair of alleles, per nucleotide, synonymous sites only

<sup>7</sup>average number of difference per pair of alleles, per nucleotide, nonsynonymous sites only
